# Supplementary material
Source: Springer Nature journal article supplement (https://www.springermedizin.de/resource/supplementary/13046_2008_11_MOESM1_ESM.pdf/9661322)

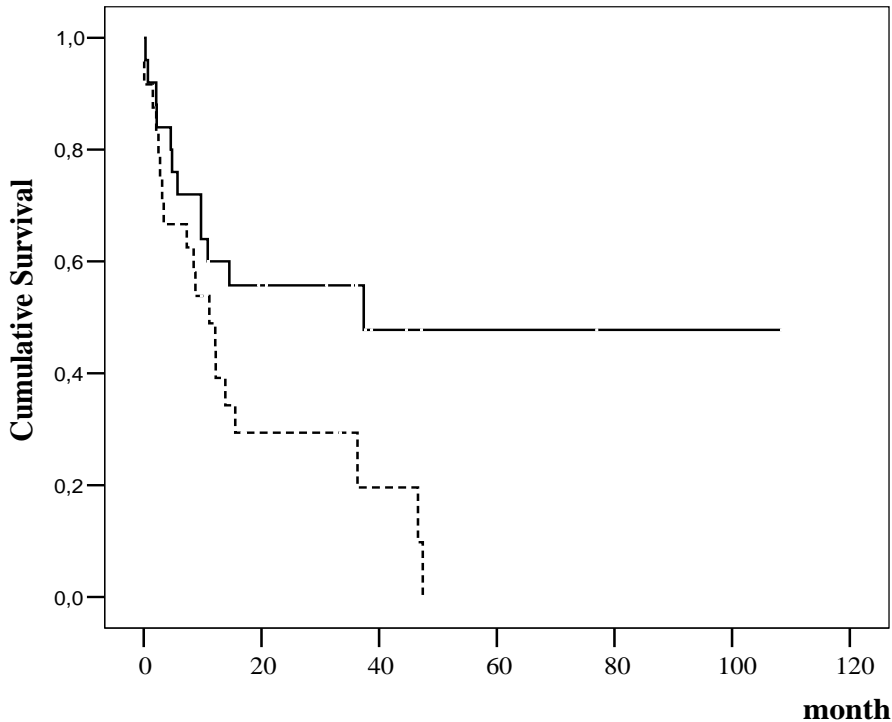

**P. Fractures**

- - - Yes
- No

Supplement: MOESM1 [file 9661322]
